1 **Interleukin-4 signaling plays a major role in urogenital schistosomiasis-associated bladder**  
2 **pathogenesis**

3 Evaristus C. Mbanefo<sup>1,2</sup>, Chi-Ling Fu<sup>3,4</sup>, Christina P. Ho<sup>1</sup>, Loc Le<sup>2,6</sup>, Kenji Ishida<sup>2</sup>, Michael H.  
4 Hsieh<sup>1,2,5\*</sup>

5  
6 **Affiliations**

7 <sup>1</sup>Division of Urology, Children's National Medical Center, Washington, DC, USA

8 <sup>2</sup>Bladder Immunology Group, Biomedical Research Institute, Rockville, MD, USA

9 <sup>3</sup>Stanford University School of Medicine, Stanford, CA, USA

10 <sup>4</sup>Pharmacyclics, Sunnyvale, CA, USA (present affiliation)

11 <sup>5</sup>Department of Urology, The George Washington University, Washington, D.C., USA

12 <sup>6</sup>Center for Tropical Medicine and Infectious Diseases, Texas Tech University Health Sciences Center,  
13 Lubbock, Texas.

14

15 **\*Corresponding author**

16 Michael H. Hsieh, MD, PhD. Children's National Medical Center, 111 Michigan Avenue NW,  
17 Washington, DC, email: [mhsieh@cnmc.org](mailto:mhsieh@cnmc.org).

18

19 **Abstract**

20 IL-4 is crucial in many helminth infections, but its role in urogenital schistosomiasis, infection with  
21 *Schistosoma haematobium* worms, remains poorly understood due to a historical lack of animal models.  
22 The bladder pathology of urogenital schistosomiasis is caused by immune responses to eggs deposited in  
23 the bladder wall. A range of pathology occurs, including urothelial hyperplasia and cancer, but  
24 associated mechanisms and links to IL-4 are largely unknown. We modeled urogenital schistosomiasis  
25 by injecting the bladder walls of IL-4 receptor-alpha knockout (*Il4ra*<sup>-/-</sup>) and wild type mice with *S.*  
26 *haematobium* eggs. Readouts included bladder histology and *ex vivo* assessments of urothelial  
27 proliferation, cell cycle and ploidy status. We also quantified the effects of exogenous IL-4 on urothelial

28 cell proliferation *in vitro*, including cell cycle status and phosphorylation patterns of major downstream  
29 regulators in the IL-4 signaling pathway. There was a significant decrease in the intensity of  
30 granulomatous responses to bladder-wall injected *S. haematobium* eggs in *Il4ra*<sup>-/-</sup> versus wild type mice.  
31 *S. haematobium* egg injection triggered significant urothelial proliferation, including evidence of  
32 urothelial hyperdiploidy and cell cycle skewing in wild type but not *Il4ra*<sup>-/-</sup> mice. Urothelial exposure to  
33 IL-4 *in vitro* led to cell cycle polarization and increased phosphorylation of AKT. Our results show IL-4  
34 signaling is required for key pathogenic features of urogenital schistosomiasis, and that particular  
35 aspects of this signaling pathway may exert these effects directly on the urothelium. These findings  
36 point to potential mechanisms by which urogenital schistosomiasis promotes bladder carcinogenesis.

37

## 38 **Introduction**

39 The pathogenesis due to schistosomiasis is chiefly a product of type-2 granulomatous immune response  
40 to the antigens secreted from the tissue-lodged parasite eggs [1]. The onset of egg deposition coincides  
41 with interleukin-4 (IL-4) production, the key inducer of Th2 response [2, 3]. The induction of Th2  
42 response co-occur with the downregulation of Th1 response [4], and this immune phenotype is exploited  
43 by the parasite to complete their development to reproductive maturity [5], in addition to driving  
44 immuno-pathogenesis by orchestrating granulomatous response against egg antigens [6]. Indeed, in  
45 absence of this immune polarization, there is marked decline in tissue egg burden and egg-induced  
46 pathogenesis [7-10]. Egg secreted antigens induce release of cytokines to tightly regulate this otherwise  
47 lethal inflammatory response [11-13], allowing the parasite to survive for decades within the host; but  
48 unfortunately sets the stage for the characteristic fibrotic response. For intestinal schistosomiasis,  
49 hepatosplenomegaly and portal hypertension may result, or bladder cancer in the case of urogenital  
50 schistosomiasis.

51 The exact underlying mechanism by which schistosome eggs induce IL-4 production/release is still  
52 uncertain [2]. The major sources of IL-4 have also been shown to include other sources beyond the Th2  
53 cells themselves [14]. Parasite egg crude extract has been shown to stimulate enormous IL-4 release  
54 from basophils [2, 15], mast cells and other non-T-cell, non-B-cell populations [16], which may indeed  
55 represent constitutive sources of IL-4, apart from the Th2 cells. Other Fcε receptor negative non-

56 lymphocyte sources of IL-4 have also been reported [17, 18]. The most abundant IL-4 inducing egg  
57 antigen has since been identified and characterized from *S. mansoni* and *S. haematobium* [2, 15, 19, 20].  
58 The interleukin-4 inducing principle from Schistosoma eggs (IPSE) binds to IgE on the surface of these  
59 non-T-cell sources, inducing massive IL-4 release that subsequently drive type-2 response [2, 15, 19,  
60 20].

61 Although the role of IL-4 in driving schistosomiasis-induced pathogenesis is widely studied for hepato-  
62 splenic schistosomiasis, it remains to be fully shown whether similar mechanisms are present in  
63 urogenital schistosomiasis induced pathogenesis, which includes bladder carcinogenesis. This is mainly  
64 due to the lack of a tractable animal model and research reagents. We recently pioneered surgical  
65 introduction of eggs in the bladder walls as a model of urogenital schistosomiasis, reproducing most of  
66 the pathological changes associated with human *S. haematobium* infection in this intramural model [21-  
67 23]. Notwithstanding that urothelial cells have been shown to express IL-4 receptor [24, 25], there is  
68 paucity of studies on the role of IL-4 in urothelial changes in normal and disease states. Here, we  
69 examined the mechanistic role of IL-4 in the induction of bladder pathogenesis and carcinogenesis  
70 during urogenital schistosomiasis. We found that IL-4 receptor signaling is required for the  
71 recapitulation of the pathogenic features akin to human urogenital schistosomiasis. We further observed  
72 features consistent with oncogenesis and showed that the IL-4 effect on the urothelium driving bladder  
73 cancer is likely via signaling through the PI3K-Akt Pathway.

74

## 75 **Results**

### 76 **Diminished bladder granuloma formation in egg-injected, IL-4 receptor-deficient mice**

77 To understand whether the IL-4 receptor is required for the development of urogenital schistosomiasis  
78 associated bladder pathogenesis, we compared bladder granuloma formation in wild type BALB/c mice  
79 and IL-4 receptor knock out (IL-4R $\alpha$  KO) mice (BALB/c background) following injection of *S.*  
80 *haematobium* eggs into the bladder wall. Wild type BALB/c mice and IL-4R $\alpha$  KO mice were challenged  
81 with 3000 *S. haematobium* eggs by surgical intramural injection into the bladder wall. Ultrasonographic  
82 examination was performed 9 days post injection to evaluate the size of the granulomas. As shown in

83 Figure 1, there was significant reduction in the size of bladder granulomas in IL-4R $\alpha$ -deficient versus  
84 wild type mice ( $p = 0.0347$ ) (Figure 1 and Figure S1).

85 We next conducted histologic examination of the egg-injected bladders. Low and high-power fields did  
86 not reveal any apparent differences in microscopic granuloma architecture (Figure 2). These data  
87 suggest that signaling via IL-4R $\alpha$  helps determine the magnitude of the bladder granulomatous response  
88 during urogenital schistosomiasis but may be dispensable with regards to development of granuloma  
89 structure.

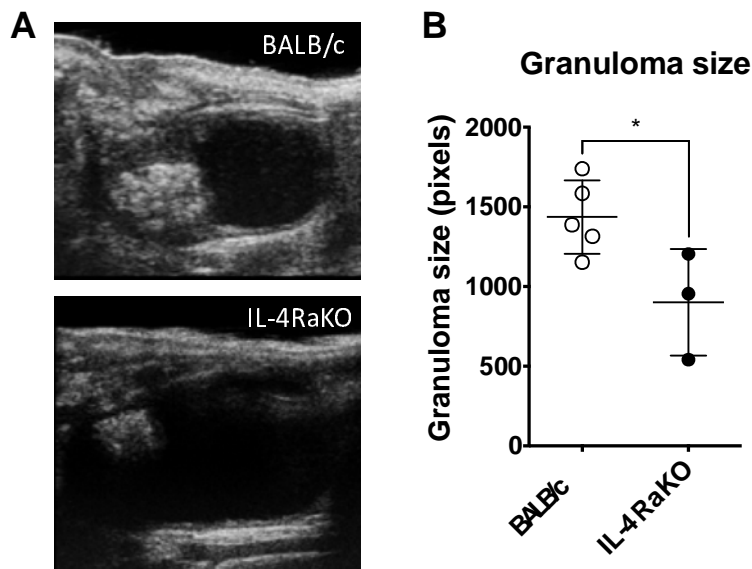

90

91 **Figure 1. IL-4R $\alpha$  KO mice demonstrate reduced egg-induced bladder granuloma size compared to**  
92 **wild type BALB/c mice.** The bladders of BALB/c mice and IL-4R $\alpha$  KO mice were intramurally  
93 injected with 3000 *S. haematobium* eggs. Granuloma size was evaluated 9 days post injection by  
94 ultrasonography. (A) Representative ultrasonographic images of the egg-injected bladders of BALB/c  
95 and IL-4RKO mice. (B) Measurements of sonographic granuloma size (also see Figure S1). The size of  
96 bladder granulomas in IL-4R $\alpha$ -deficient mice was significantly reduced compared to wild type mice.  
97 Dot plots depict individual bladder granuloma size as analyzed using ImageJ. The midpoint of each dot  
98 plot shows the mean while the error bars represent one standard deviation.

99

**A.** BALB/c

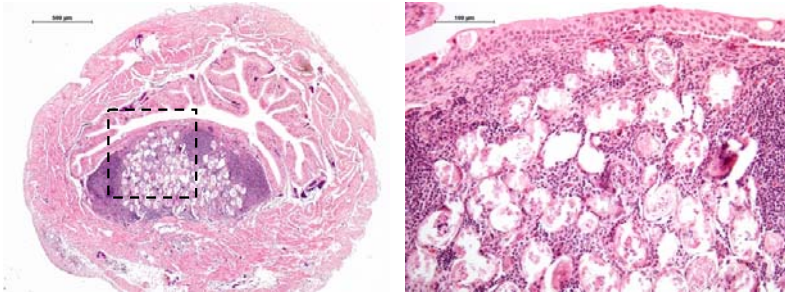

**B.** IL-4RaKO

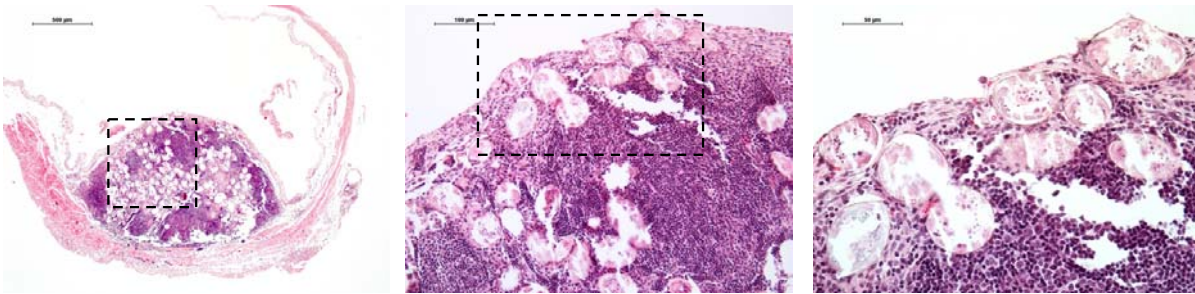

100

101 **Figure 2. *S. haematobium* egg-induced bladder granuloma architecture is not IL-4 receptor-**  
102 **dependent.** Wild type BALB/c mice (A) and IL-4R $\alpha$  KO mice (B) were intramurally injected with 3000  
103 *S. haematobium* eggs into the bladder wall. The bladders were excised 9 days post injection, fixed,  
104 dehydrated, embedded in paraffin, stained with hematoxylin and eosin, and sectioned. Representative  
105 low and high-power fields shown.

106

107 ***Schistosoma haematobium* eggs injection induce potentially pre-oncogenic cell cycle changes in**  
108 **urothelial cells.**

109 We next examined whether injection of *S. haematobium* eggs into the walls of a normal mouse bladder  
110 would produce potentially pre-oncogenic features in the urothelium, i.e., urothelial cell cycle  
111 polarization and development of hyperdiploidy. Mice were challenged with 3000 *S. haematobium* eggs  
112 by injection into the bladder wall. Bladders were excised, enzymatically processed and  
113 EpCAM<sup>+</sup>Uroplakin Ib<sup>+</sup>CD45<sup>-</sup> urothelial cells identified via flow cytometry. While no apparent  
114 difference was observed in the proportion of cells at the G0/G1 phase of the cell cycle, there was a

115 statistically significant increase in the proportion of urothelial cells at the S-phase in the group of mice  
116 receiving intramural egg injections as compared to groups receiving sham or no injections. In addition,  
117 there was significant increase in the proportion of urothelial cells exhibiting hyperdiploidy in the group  
118 of mice receiving bladder wall egg injections (Figure 3).

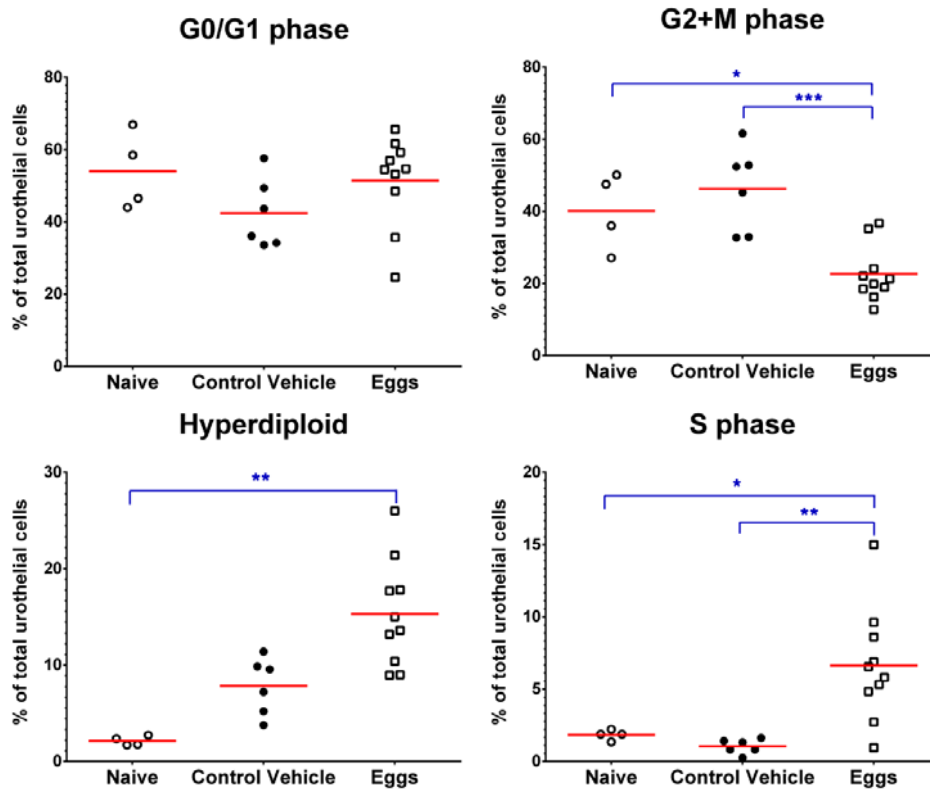

119

120 **Figure 3. *Schistosoma haematobium* eggs drive potentially pre-oncogenic cell cycle and ploidy**  
121 **changes in the urothelium.** Wild type BALB/c mice underwent bladder wall injection with 3000 *S.*  
122 *haematobium* eggs (isolated from infected hamster tissues) or vehicle (uninfected hamster tissue  
123 extract). Bladders were subjected to cell cycle analysis 4 weeks post-injection. Uroplakin 1b and  
124 EpCAM were used to isolate urothelial cells prior to cell cycle profiling (Figure S2). Compared to the  
125 vehicle-injected group, there was significant increase in the proportion of cells in the S-phase and  
126 decrease in G2+M phase cells following bladder wall egg injection. There was also significant increase  
127 in the proportion of cells showing hyperdiploidy in the egg-injected group. There was no difference in  
128 the proportion of cells in the G0/G1 phase. Red horizontal lines denote experimental group means.

129



130 ***Schistosoma haematobium* egg-induced urothelial cell cycle polarization is IL-4 receptor-**  
131 **dependent**

132 Next, we sought to examine whether the observed *S. haematobium* egg-induced, potentially pre-  
133 oncogenic changes in urothelial cells were dependent on IL-4 receptor signaling. Wild type BALB/c and  
134 IL-4R $\alpha$  KO mice were either challenged by bladder intramural injection with 3000 *S. haematobium* eggs  
135 or sham bladder wall injection of hamster liver and intestinal extract. At week 4 post-injection, all  
136 groups of mice, in addition to an unmanipulated naïve group of BALB/c mice, were administered BrdU  
137 to label actively proliferating cells. Twenty-four hours after BrdU administration, bladders were  
138 aseptically excised and subjected to flow cytometry to detect BrdU-labeled cells. As expected, there was  
139 a significant increase in the proportion of bladder cells in both S-phase and G2/M phase in wild type,  
140 egg injected vs. naïve mice ( $p = 0.0038$  and  $p = 0.0026$ , respectively) and in wild type mice receiving a  
141 sham bladder wall injection ( $p = 0.0117$  and  $p = 0.0003$ , respectively) (Figure 4). There was a  
142 statistically significant decrease in the proportion of S-phase cells in the bladders of egg-injected IL-4R $\alpha$   
143 KO vs. wild type mice ( $p = 0.0058$ , Figure 4). Similarly, the proportion of cells in the G2/M phase was  
144 significantly decreased in the egg-injected IL-4R $\alpha$  KO mice ( $p = 0.0006$ ), and sham treated IL-4R $\alpha$  KO  
145 mice ( $p = 0.0009$ ), as compared to egg-injected wild type mice. Interestingly, there was also a significant  
146 decrease in the proportion of S-phase cells in the egg-injected IL-4R $\alpha$  KO mice ( $p = 0.0452$ ) compared  
147 to the sham treated IL-4R $\alpha$  KO mice (Figure 4B). Taken together, these results indicate *S. haematobium*  
148 eggs potently induce bladder cell cycle skewing in an IL-4R $\alpha$ -dependent fashion.

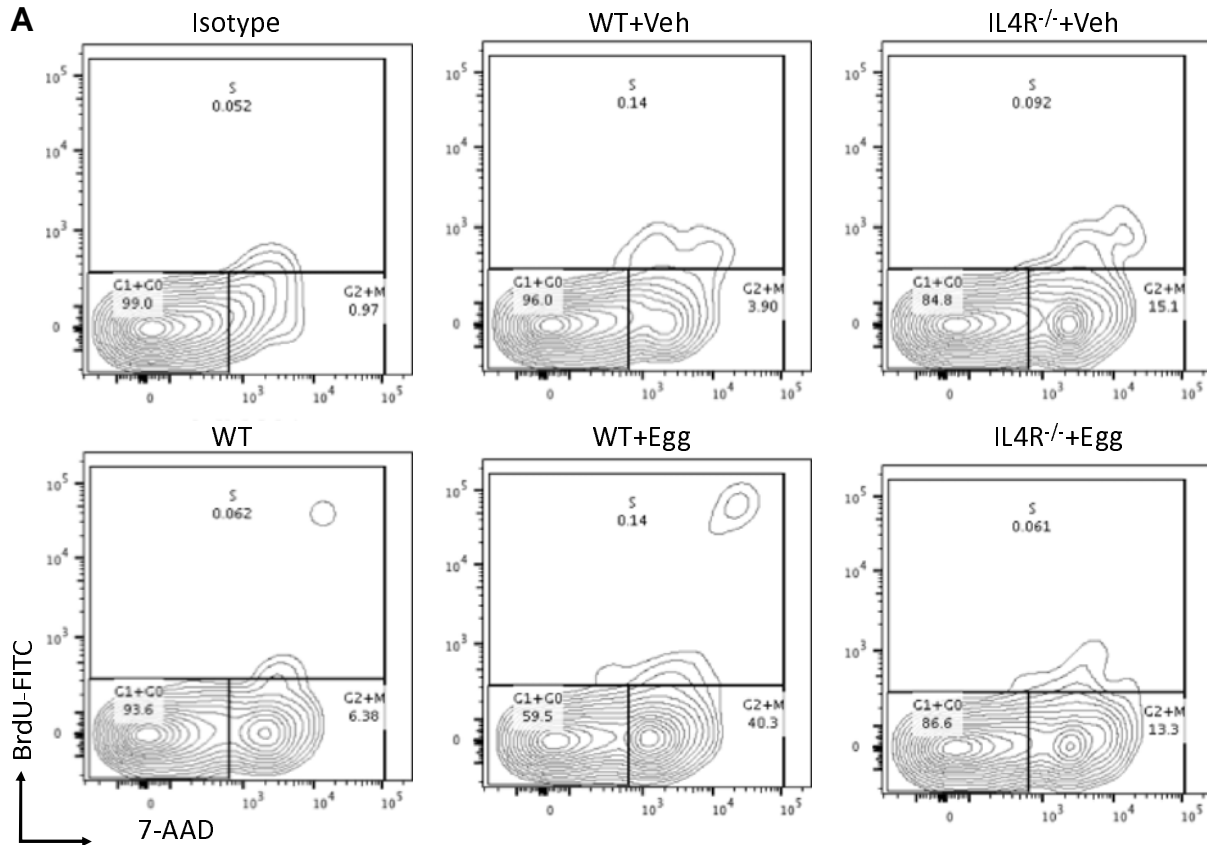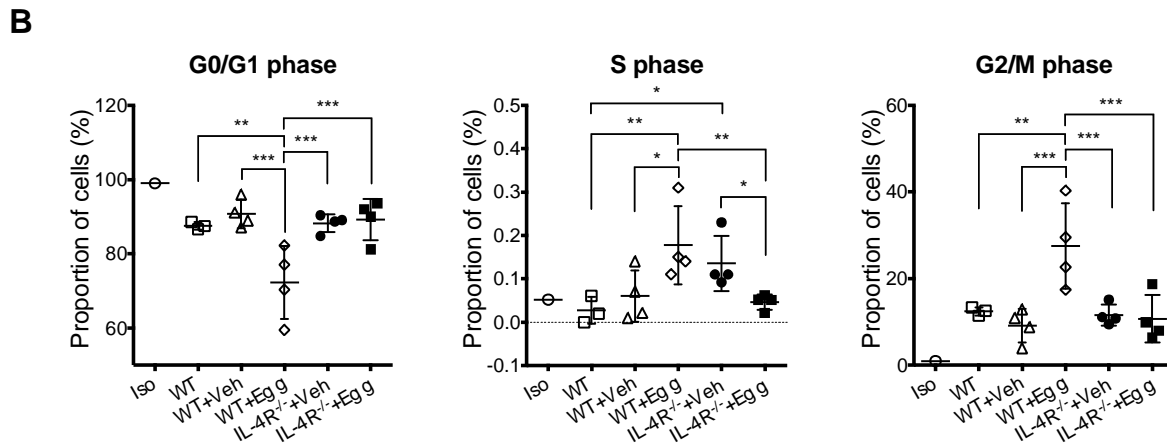

149

150 **Figure 4. *Schistosoma haematobium* eggs drive cell cycle polarization in an IL-4 receptor-**  
 151 **dependent manner.** BALB/c mice or IL-4 receptor-deficient mice underwent bladder intramural  
 152 injection with 3000 *S. haematobium* eggs (from infected hamster tissues) or vehicle (uninfected hamster  
 153 tissue extract). (A) Bladders were subjected to BrdU staining and cell cycle analysis 4 weeks post-  
 154 injection. (B) Compared to the egg-injected wild type group, in the egg-injected IL-4 receptor-deficient  
 155 group, there was a significant decrease in the proportion of cells in the S-phase and G2+M phase, with a



156 commensurate increase in the proportion of cells in the G0/G1 phase. The IL-4 receptor-deficient group  
157 exhibited cell cycle status profiles akin to the sham-injected group. Horizontal bars in each dot plot  
158 shows the mean, error bars represent one standard deviation.

159

### 160 *IL-4 receptor expression in the bladder is predominantly on the urothelium*

161 Given the clear effects of IL-4 receptor signaling on *S. haematobium* egg-induced bladder pathogenesis,  
162 we next sought to determine whether IL-4 can act directly on urothelial cells. We compared the  
163 expression levels of IL-4R $\alpha$  in the urothelium as compared to the detrusor smooth muscle cells (the  
164 other major cell type in the bladder besides the urothelial cell) using real-time quantitative PCR (Figure  
165 5). We observed an approximately 2-fold increase in the expression of IL-4R $\alpha$  in the urothelium as  
166 compared to the bladder detrusor.

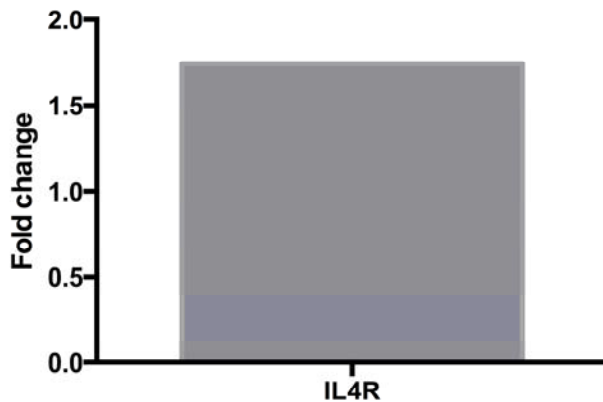

167

168 **Figure 5. IL-4R expression in the bladder is mainly localized to the urothelium.** Bladders were  
169 aseptically excised from mice followed by laser microdissection to isolate mouse bladder urothelium.  
170 Urothelial and detrusor cells were assayed for IL-4R expression using qPCR, and urothelial expression  
171 was calculated relative to detrusor expression.

172

### 173 *Exogenous IL-4 induces urothelial proliferation*

174 To confirm that the observed, potentially pre-oncogenic changes in mouse urothelial cells were chiefly  
175 IL-4R $\alpha$ -dependent and not due to other, unrelated effects of the parasite eggs, and to confirm our  
176 findings in a human model system, we performed *in vitro* assays using recombinant IL-4 and the human  
177 urothelial cell line HCV-29. HCV-29 cells were co-incubated with increasing concentrations of  
178 recombinant human IL-4, followed by assessment of cell proliferation and cell cycle changes. CFSE  
179 assays verified that IL-4 triggers urothelial proliferation (Figure 6). Cell cycle analysis revealed  
180 concentration-dependent increases in the proportion of cells in the G2/M phase at 0.1 $\mu$ g/ml ( $p < 0.0001$ )  
181 and 1 $\mu$ g/ml ( $p < 0.0001$ ) of IL-4 (Figure 7). There was also a concomitant concentration-dependent  
182 decrease in the proportion of cells in the G0/G1 phase at 0.1 $\mu$ g/ml ( $p = 0.0008$ ) and 1 $\mu$ g/ml ( $p < 0.0001$ )  
183 of IL-4.

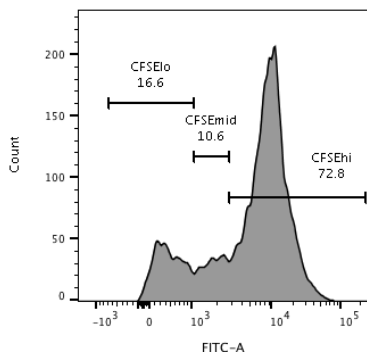

184

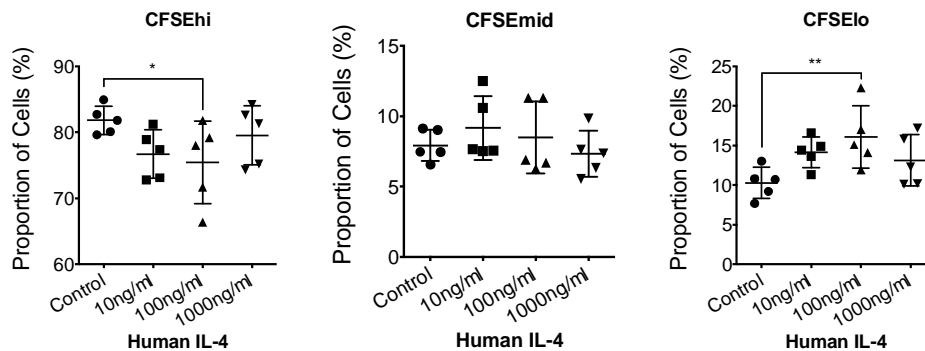

185

186 **Figure 6. IL-4 directly drives urothelial proliferation.** HCV-29 cells were stained with CFSE dye and  
187 then analyzed by flow cytometry to evaluate for cell proliferation as quantified by dye intensity. Upper  
188 left panel, example of gating strategy for CFSE intensity. G3 denotes cells that have not proliferated, G2  
189 and G1 denotes cells that have proliferated and as a result feature lower levels of CFSE staining. Lower  
190 panels show proportions of cells as a function of CFSE staining intensity and IL-4 concentrations.

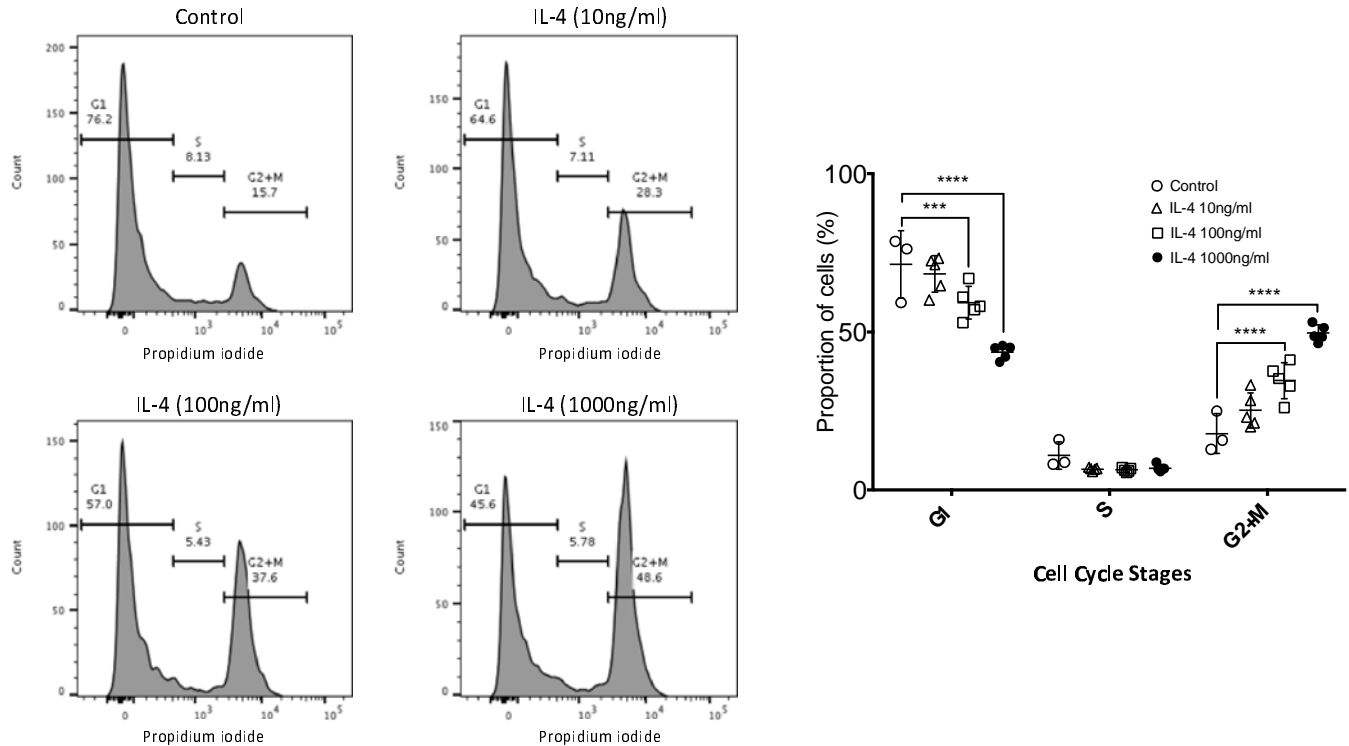

191

192 **Figure 7. IL-4 directly induces urothelial cell cycle polarization *in vitro*.** HCV-29 cells were co-  
 193 incubated for 48 hours with increasing concentrations of recombinant IL-4, and then were subjected to  
 194 cell cycle analysis. Propidium iodide staining of cellular DNA of fixed cells was used to evaluate cell  
 195 cycle phases. Horizontal bars in the dot plots denote the mean and error bars represent one standard  
 196 deviation.

197

198 ***IL-4 drives urothelial proliferation via the IL-4R $\alpha$ /PI3K/AKT signaling pathway***

199 IL-4 signaling progresses through two receptor complexes: heterodimers of the IL-4R $\alpha$  and IL-2R $\gamma$   
 200 chain (type I receptor) and the IL-4R $\alpha$  and IL-13R $\alpha$ 1 complex (type II receptor). These receptors trigger  
 201 signaling via one or more of three cascades, viz: STAT6, PI3K/AKT and the ERK1/2 signaling pathway  
 202 [26]. To ascertain the pathways through which IL-4 exerts its proliferative and cell cycle effects on  
 203 urothelial cells, we used phospho-flow cytometry to ascertain the IL-4-induced phosphorylation status of  
 204 relevant downstream proteins in MB49 mouse urothelial cells. Compared to urothelial cells incubated in  
 205 the absence of recombinant mouse IL-4, and urothelial cells incubated with or without IL-4 but stained

206 with sham antibody instead of phosphorylated AKT antibody, urothelial cells co-incubated with IL-4  
207 and stained with phosphorylated AKT antibody showed a significant increase in the phosphorylation  
208 status of AKT protein ( $p < 0.0001$ ) (Figure 8). We also found increased AKT phosphorylation in IL-4-  
209 exposed versus unexposed human urothelial HCV-29 cells (Figure S3). There was relatively less  
210 phosphorylation of STAT6 in HCV-29 urothelial cells, but this difference was nevertheless statistically  
211 significant compared to controls ( $p = 0.0077$ ) (Figure S3). There was no change in the phosphorylation  
212 status of STAT6 and ERK1/2 (Figure S3). Moreover, bladder tissue from IL-4 receptor-deficient mice  
213 exhibited less AKT phosphorylation after *ex vivo* incubation with IL-4 compared to tissue from wild  
214 type mice (Figure S4). Taken together, these results show that IL-4 induces proliferative and cell cycle  
215 alterations in urothelial cells mainly via the PI3K/AKT signaling cascade.

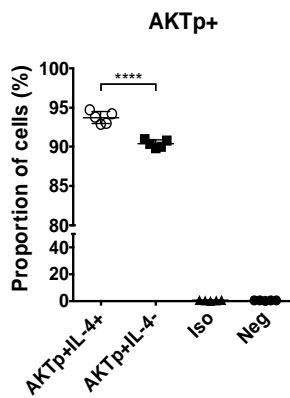

216

217 **Figure 8. IL-4 directly increases AKT phosphorylation in urothelial cells.** Mouse MB49 urothelial  
218 cells were incubated with recombinant IL-4 or no IL-4 and subjected to phosphor flow cytometry. “Iso”,  
219 isotype control antibody, “Neg”, no antibody staining.

220

## 221 Discussion

222 IL-4 is arguably the classic cytokine associated with type 2 immune responses, including those directed  
223 against helminths (as reviewed by Webb and Tait-Wojno, among others [27]). Among human-specific  
224 helminths, schistosomes account for approximately 200 million infections worldwide, with the majority  
225 of these infections being urogenital and caused by *Schistosoma haematobium* [28]. Although IL-4 is also  
226 believed to be important in the bladder pathogenesis of urogenital schistosomiasis (chronic infection

227 with *S. haematobium*), direct evidence of this hypothesized relationship has been scant. Much of the lack  
228 of supporting data has been due to difficulties with modeling urogenital schistosomiasis. We have  
229 previously shown that following micro-injection of purified *S. haematobium* eggs into the mouse  
230 bladder wall, most of the morphological features and pathological changes reminiscent of human  
231 urogenital schistosomiasis are reproduced in this tissue environment [1]. The response in this setting was  
232 rapid in onset and localized, including induction of IL-4. In other studies, we also showed that *S.*  
233 *haematobium* egg antigens induce IL-4 release from non-lymphocyte populations [20], mainly by  
234 activation via their surface Fcε receptors. Herein we sought to use our micro-injection technique to  
235 define the role of IL-4 in schistosomal bladder pathogenesis.

236 Infection with *S. haematobium* can result in a wide range of bladder pathogenesis, such as fibrosis,  
237 hyperplasia, dysplasia, squamous metaplasia, hematuria, and ultimately bladder cancer [29-32]. The link  
238 between *S. haematobium* infection and bladder cancer is so strong that the International Agency for  
239 Research on Cancer considers urogenital schistosomiasis as a class-1 carcinogen, “carcinogenic to  
240 humans” [33]. This parasitic infection is arguably one of the most important risk factor for bladder  
241 cancer globally, synergizing with other determinants like smoking, diet, host genetics, other  
242 environmental exposures and co-infection with other uropathogens [29]. Previously, we used p53 haplo-  
243 insufficient mice to demonstrate that loss of one allele of p53, in combination with *S. haematobium* egg  
244 injection, was sufficient to induce pre-carcinogenic lesions in the bladder [31]. We have also reported  
245 that massive shifts in DNA methylation occur in the mouse urothelium following bladder injection with  
246 *S. haematobium* eggs, and that these methylation changes drive urothelial proliferation, a necessary but  
247 not sufficient condition for bladder carcinogenesis [23]. Alterations in cell cycle regulation are  
248 associated with genomic instability, neoplasia and cancer progression, all of which are characteristic of  
249 urogenital schistosomiasis-associated bladder cancer [34]. We show here again that intramural injection  
250 of eggs into the bladder induces potentially pre-oncogenic cell cycle changes in urothelial cells, marked  
251 by increased S-phase populations and, interestingly, urothelial cell hyperploidy. Given that urothelial  
252 hyperplasia is triggered by *S. haematobium* eggs and is a feature of pre-neoplasia [31], this intramural  
253 egg injection model may be a step towards development of a tractable model of urogenital  
254 schistosomiasis-associated bladder cancer. Together, this body of work suggests that studying host  
255 responses to bladder wall injection with *S. haematobium* eggs may reveal important principles  
256 underlying schistosomal bladder pre-carcinogenesis.

257 One important principle underpinning schistosomal pathogenesis, independent of parasite species, is the  
258 importance of IL-4. For instance, the onset, development and progression of the granulomatous response  
259 and egg shedding during *Schistosoma japonicum* and *S. haematobium* infection, respectively, are  
260 regulated by the IL-4 signaling cascade [9, 35]. Signaling through the IL-4 receptor (IL-4R $\alpha$ ) also drives  
261 the chronic inflammatory response to the tissue-lodged eggs, which determines granuloma size, its  
262 cellular and matrix composition [10, 36], regulates the fibrotic repair response, and presumably  
263 subsequent carcinogenic sequelae. In fact, studies have demonstrated absent or significantly diminished  
264 granulomatous pathology in IL-4R $\alpha$ -deficient mice compared to wild type and even IL-4-deficient mice  
265 [37]. This indicates that granuloma formation is not just dependent on the presence of IL-4, but rather  
266 also on the cascades downstream of IL-4R $\alpha$ . Consistent with the foregoing, we used our intramural  
267 bladder wall egg injected mice model of urogenital schistosomiasis [21] to demonstrate significant  
268 decreases in granuloma size in IL-4R $\alpha$ -deficient animals, indicating that signal transduction through IL-  
269 4R $\alpha$  is required for the development of this central aspect of urogenital schistosomiasis induced immune  
270 pathogenesis.

271 We also present findings consistent with a role for IL-4R $\alpha$  signaling in urogenital schistosomiasis-  
272 associated, potentially pre-oncogenic changes in the urothelium. *S. haematobium* egg-injected bladders  
273 from IL-4R $\alpha$ -deficient mice showed significant decreases in the proportion of cells in both the S-phase  
274 and the G2/M-phases of the cell cycle as compared to egg-injected wild type mice and sham-injected IL-  
275 4R $\alpha$ -deficient mice. Our emerging data from co-incubation of urothelial cell lines with *S. haematobium*  
276 orthologs of IPSE (Interleukin-4 inducing principle from *Schistosoma mansoni* eggs), show that IPSE  
277 and its IL-4-dependent effects may be one major driver of schistosomiasis-associated pre-oncogenesis  
278 (manuscript in preparation).

279 Prior work has pointed to tissue-specific roles for IL-4 receptor signaling in schistosomiasis. Namely,  
280 IL-4 receptor expression on alternatively activated macrophages and myeloid cells in general appears to  
281 drive specific aspects of *S. mansoni* pathology [38, 39]. IL-4 receptor expression by diverse cell types  
282 such as CD4<sup>+</sup> and CD4<sup>-</sup> T cells [40, 41], smooth muscle cells [42], B cells [43], FoxP3<sup>+</sup> regulatory T  
283 cells [44], and CD11c<sup>+</sup> cells [45]. This corpus of research suggested to us that urothelial IL-4 receptor  
284 could be important in the bladder pathogenesis of urogenital schistosomiasis. Indeed, several studies  
285 have reported expression of IL-4 receptor in the bladder, presumably on the urothelium [24, 25]. After  
286 confirming that most IL-4 receptor expression in the bladder was on the urothelium, we exposed



287 urothelial cells to exogenous IL-4 and found that IL-4 induces urothelial proliferation. Interestingly, this  
288 potentially pro-oncogenic effect is mainly via the IL-4R $\alpha$ /PI3K/AKT signaling pathway and partly  
289 mediated through the STAT6 arm of the IL-4R $\alpha$  cascade. This is particularly interesting because the  
290 PI3K/AKT and STAT6 arms of the IL-4R $\alpha$  signaling cascade have been shown to be associated with  
291 promotion of cell proliferation and inhibition of apoptosis [26, 46, 47]. Indeed, Conticello *et al.* noted  
292 that IL-4 signaling enhanced urothelial and non-urothelial cancer cell resistance to CD95- and  
293 chemotherapy-triggered apoptosis [25]. Studies on several IL-4R $\alpha$ -dependent mechanisms have also  
294 demonstrated pro-oncogenic effects of IL-4 signaling [46, 48], including promotion of cancer  
295 progression and metastasis in the bladder and other tissues [49, 50]. Conversely, strategies that block the  
296 IL-4R $\alpha$  signaling cascade have been combined with cancer therapies to improve efficacy and reduce  
297 toxicity [26, 51]. Also, IL-4 and its fellow type 2 cytokine IL-13, as well as their cognate receptors, may  
298 have potential as biomarkers for tumor aggressiveness [47]. Venmar *et al.* showed that attenuation of IL-  
299 4R $\alpha$  via the PI3K/AKT pathway reduces breast tumor cell survival and metastatic capacity [52]. All  
300 these studies are consistent with our observation that IL-4R $\alpha$  signaling in the urothelium exerts a  
301 potentially pro-oncogenic effect, chiefly via the PI3K/AKT signaling pathway.

302 Although, to our knowledge, our observations regarding direct effects of IL-4 on the urothelium are the  
303 first to directly link type-2 immune responses to urogenital schistosomiasis and bladder pathogenesis,  
304 they may have relevance beyond *S. haematobium* infection. For instance, IL-4 may be important in other  
305 bladder-specific conditions, namely acute cystitis and overactive bladder [53, 54]. Future work focusing  
306 on urothelial IL-4 receptor signaling in various diseases may reveal novel diagnostic and therapeutic  
307 approaches and will promote our understanding of these conditions.

308 The work presented here has limitations worth noting. We have not ruled out an important role for  
309 leukocyte-urothelial interactions. Our *in-vivo* and *ex-vivo* urothelial observations in IL-4 receptor-  
310 deficient mice could have been confounded by the lessened granulomatous responses to eggs, which  
311 may have led to a dampened leukocyte-urothelial interface (whether mediated by cytokines and/or direct  
312 cell interactions). However, our *in-vitro* findings that IL-4 can mediate direct effects on urothelial cells  
313 indicate that it is possible that type-2-polarized immune responses may exert some of their effects on the  
314 bladder through IL-4-induced urothelial actions. Subsequent efforts will further focus on urothelial-  
315 specific IL-4 receptor signaling.

316 In conclusion, we have shown that IL-4 receptor signaling is required for the recapitulation of the  
317 pathogenetic features of urogenital schistosomiasis in the bladder. Namely, we showed that *S.*  
318 *haematobium* eggs induced urothelial proliferation, including evidence of urothelial hyperdiploidy.  
319 Interestingly, we further observed that these urothelial changes were dependent on IL-4 receptor  
320 signaling. The observation of features possibly consistent with pre-oncogenesis following urothelial  
321 exposure to IL-4 underline the potential importance of IL-4R signaling in pre-oncogenesis, and  
322 specifically urogenital schistosomiasis-associated bladder carcinogenesis. These IL-4-induced urothelial  
323 cell proliferation changes and potentially bladder carcinogenesis appear to involve the PI3K/AKT  
324 signaling cascade.

325

## 326 **Materials and Methods**

### 327 ***Ethics statement***

328 Animal experiments reported here were carried out in accordance with relevant U.S. and international  
329 guidelines. Experimental protocols were reviewed and approved by the Institutional Animal Care and  
330 Use Committee (IACUC) of the Biomedical Research Institute (BRI), Rockville, Maryland, United  
331 States. These guidelines comply with the U.S. Public Health Service Policy on Humane Care and Use of  
332 Laboratory Animals.

### 333 ***Mice, cells and reagents***

334 Female BALB/c mice and IL-4R $\alpha$  KO mice (*Il4ra*<sup>-/-</sup>, BALB/c genetic background) were obtained from  
335 Jackson Laboratory and were housed in a 12-hour light/dark cycle with dry mouse chow and water  
336 available *ad-libitum*. The human bladder epithelium (urothelium) cell line HCV-29 (a generous gift from  
337 Paul Brindley, George Washington University) was grown in T-75 tissue culture flasks in DMEM  
338 (Gibco) supplemented with 10% heat-inactivated FBS (Gibco) and 1 $\times$  antibiotic-antimycotic (100 U/ml  
339 penicillin, 100  $\mu$ g/ml streptomycin, 0.25  $\mu$ g/ml Amphotericin B; Gibco) under 5% CO<sub>2</sub> at 37 °C.  
340 Recombinant IL-4 was purchased from BioLegend (BioLegend, USA).

### 341 ***Isolation of Schistosoma haematobium eggs***

342 Male Golden Syrian LVG hamsters infected with *S. haematobium* were obtained from the National  
343 Institutes of Health-National Institute of Allergy and Infectious Diseases (NIH-NIAID) Schistosomiasis  
344 Resource Center at BRI. As previously described [21, 29], the hamsters were sacrificed around 16-18  
345 weeks after exposure, the livers and intestines were excised, which were then processed in a blender and  
346 passed through sieves of pore sizes of 450, 180, 100, and 45 microns using cold 1.2% NaCl solution.  
347 The material from the final 45-micron sieve was transferred to and swirled in a glass petri dish and  
348 purified parasite eggs were collected from the center of the dish. Uninfected hamster livers and  
349 intestines were similarly processed to prepare control (vehicle) hamster extract.

### 350 *Mouse bladder wall injection*

351 As described previously [21, 29, 55], mice were placed under systemic isoflurane anesthesia, their  
352 abdomens depilated and disinfected, and locally administered bupivacaine and buprenorphine. The  
353 bladder was exposed through a laparotomy, and 3,000 *S. haematobium* eggs in 50  $\mu$ l of PBS were  
354 intramurally injected into the submucosal layer (bladder wall). Control mice were injected with  
355 control/vehicle hamster extract. The incision was closed with 4-0 polyglycolic acid suture and 4-0 silk  
356 suture, followed by local application of antibiotic ointment.

### 357 *Ultrasonographic imaging and histology of mouse bladders*

358 A VisualSonics Vevo 770 high-resolution ultrasound micro-imaging system with an RMV 704 scanhead  
359 [40 MHz] (Small Animal Imaging Facility, Stanford Center for Innovation in In-Vivo Imaging) was  
360 used to transabdominally image mouse bladders [21]. For histology, bladder tissues were fixed in neutral  
361 buffered formalin, dehydrated in a series of ethanol incubations, embedded in paraffin, and stained with  
362 H&E [21].

### 363 *BrdU cell cycle assay*

364 Mice were administered 1 mg of BrdU (FITC BrdU Flow Kit; BD) by intraperitoneal injection. After 24  
365 hours, bladders were harvested, minced, incubated in tissue dissociation media (RPMI 1640, 10% heat-  
366 inactivated FBS, 15 mM HEPES, 1 $\times$  antibiotic-antimycotic, 100 U/ml collagenase type III) [56] for 1  
367 hour at 37°C with shaking, and passed through a 70-micron nylon cell strainer. The resulting single cell  
368 suspension underwent fixation, permeabilization, DNase digestion, anti-BrdU antibody-FITC labeling,

369 and 7AAD labeling, according to BrdU kit instructions. Cells were analyzed by flow cytometry using a  
370 BD FACSCanto II equipment with acquisition run on BD FACS Diva software and analysis performed  
371 on FlowJo version 10 software.

372

### 373 *Urothelial-specific flow cytometry*

374 Mouse bladders were excised, cut in half, and digested in 2.5 mg/ml of dispase in PBS for 1 hour at  
375 ambient temperature with shaking. Digested tissue was passed through 100-micron nylon cell strainers,  
376 minced, digested with 0.05% trypsin-EDTA at 37 degrees Celsius for 30 minutes, and added to the cell  
377 strainer pass-through material. The material was re-strained through another round of 100 micron nylon  
378 cell strainers. Cells were then incubated with anti-mouse CD16/CD32 in staining buffer to block non-  
379 specific Fc-mediated interactions, and then incubated with antibodies specific for EpCAM, uroplakin 1b,  
380 and CD45. For cell cycle analysis, cells were resuspended in DAPI solution (0.1% Triton X-100 + 4  
381 micrograms/mL DAPI in 1X PBS buffer) for 37° Celsius for 1 hour with shaking in the dark. Cells were  
382 then washed and resuspended with staining buffer prior to data acquisition on a flow cytometer.

383

### 384 *Cell cycle analyses and CFSE assay*

385 The human bladder epithelium (urothelium) cell line HCV-29 was grown in T-75 tissue culture flasks in  
386 complete DMEM media (Gibco) under 5% CO<sub>2</sub> at 37 °C. For cell cycle assays, 10<sup>5</sup> urothelial cells were  
387 co-incubated with recombinant human IL-4 at 0, 10, 100, or 1000 ng/ml concentrations. Following 48  
388 hours of culture, the cells were fixed and stained with propidium iodide for cell cycle analysis. For  
389 CFSE assays to assess cell proliferation, cells were stained with the CFSE dye prior to stimulation with  
390 IL-4 and cultured for 48 hours. The CFSE dye was evaluated post-culture by flow cytometry using the  
391 FITC channel. The intensity of CFSE dye, which halves with each cell cycle, was used to track the  
392 generations of urothelial cells.

### 393 *Phosphorylation analysis of IL-4R signaling pathway*

394 For phosphorylation analysis, cells were cultured as described above and subjected to intracellular  
395 staining using the Cytotfix/Cytoperm fixation and permeabilization kit (BD, USA) according to  
396 manufacturer's instructions. Fixed and permeabilized cells were then stained with antibodies against the  
397 phosphorylated forms of STAT6, ERK1/2 or AKT (ThermoFisher, USA). The stained cells were  
398 analyzed by flow cytometry using a BD FACSCanto II equipment run with BD FACS Diva software  
399 and analyzed on FlowJo software.

#### 400 ***Laser capture microdissection and real-time quantitative PCR***

401 Laser microdissection was used to isolate urothelial cells or detrusor smooth muscle cells from the  
402 bladder, followed by real time PCR to measure IL-4R expression. Following cDNA synthesis using the  
403 iScript cDNA synthesis kit (Bio-Rad, California, USA), real time PCR was performed using the iTaq  
404 universal SYBR Green Supermix, following manufacturer's protocols. The primers used for real time  
405 PCR are as follows: *IL-4R* (5'-TGGATCTGGGAGCATCAAGGT-3' and 5'-  
406 TGAAGTGCGGATGTAGTCAG-3'). Relative gene expression was then analyzed using the  $C_T$   
407 method with fold expression using the formula  $2^{(-\Delta\Delta C_T)}$  with GAPDH as the internal reference and the  
408 amplification signal from the detrusor cells as the baseline.

#### 409 ***Statistics***

410 Data analysis was performed using GraphPad Prism, version 6.00. One-way ANOVA was performed for  
411 comparison across groups and if significant, *post hoc* student *t*-tests was then used for pairwise  
412 comparisons after confirming a normal distribution of the data. Plots show individual replicates with  
413 horizontal bars denoting means and error bars denoting one standard deviation. Statistical significance  
414 was designated as  $p < 0.05$ . In the figures, \* =  $p < 0.05$ ; \*\* =  $p < 0.01$ ; \*\*\* =  $p < 0.001$ ; \*\*\*\* =  $p <$   
415 0.0001.

416

#### 417 **References**

- 418 1. Fu, C.-L., et al., *A Novel Mouse Model of Schistosoma haematobium Egg-Induced*  
419 *Immunopathology*. PLoS Pathog, 2012. **8**: p. e1002605.
- 420 2. Schramm, G., et al., *Cutting edge: IPSE/alpha-1, a glycoprotein from Schistosoma mansoni eggs,*  
421 *induces IgE-dependent, antigen-independent IL-4 production by murine basophils in vivo*. J  
422 Immunol, 2007. **178**(10): p. 6023-7.

- 423 3. Boros, D.L., *The role of cytokines in the formation of the schistosome egg granuloma.*  
424 Immunobiology, 1994. **191**(4-5): p. 441-50.
- 425 4. Metwali, A., et al., *The granulomatous response in murine Schistosomiasis mansoni does not*  
426 *switch to Th1 in IL-4-deficient C57BL/6 mice.* J Immunol, 1996. **157**(10): p. 4546-53.
- 427 5. Riner, D.K., et al., *Regulation of innate responses during pre-patent schistosome infection*  
428 *provides an immune environment permissive for parasite development.* PLoS Pathog, 2013.  
429 **9**(10): p. e1003708.
- 430 6. Pearce, E.J., et al., *Pillars article: downregulation of Th1 cytokine production accompanies*  
431 *induction of Th2 responses by a parasitic helminth, Schistosoma mansoni.* J. Exp. Med. 1991.  
432 **173**: 159-166. J Immunol, 2012. **189**(3): p. 1104-11.
- 433 7. Xu, X., et al., *A Schistosoma japonicum chimeric protein with a novel adjuvant induced a*  
434 *polarized Th1 immune response and protection against liver egg burdens.* BMC Infect Dis, 2009.  
435 **9**: p. 54.
- 436 8. Mbanefo, E.C., et al., *Immunogenicity and anti-fecundity effect of nanoparticle coated*  
437 *glutathione S-transferase (SjGST) DNA vaccine against murine Schistosoma japonicum infection.*  
438 Parasitol International, 2015. **64**(4): p. 24-31.
- 439 9. Cheng, Y.L., et al., *The effects of interleukin (IL)-12 and IL-4 deficiency on worm development*  
440 *and granuloma formation in Schistosoma japonicum-infected mice.* Parasitol Res, 2012. **110**(1):  
441 p. 287-93.
- 442 10. Eltoun, I.A., et al., *Suppressive effect of interleukin-4 neutralization differs for granulomas*  
443 *around Schistosoma mansoni eggs injected into mice compared with those around eggs laid in*  
444 *infected mice.* Infect Immun, 1995. **63**(7): p. 2532-6.
- 445 11. Hoffmann, K.F., T.A. Wynn, and D.W. Dunne, *Cytokine-mediated host responses during*  
446 *schistosome infections; walking the fine line between immunological control and*  
447 *immunopathology.* Adv Parasitol, 2002. **52**: p. 265-307.
- 448 12. Hoffmann, K.F., A.W. Cheever, and T.A. Wynn, *IL-10 and the dangers of immune polarization:*  
449 *excessive type 1 and type 2 cytokine responses induce distinct forms of lethal immunopathology*  
450 *in murine schistosomiasis.* J Immunol, 2000. **164**(12): p. 6406-16.
- 451 13. Bosshardt, S.C., et al., *IL-10 deficit correlates with chronic, hypersplenomegaly syndrome in male*  
452 *CBA/J mice infected with Schistosoma mansoni.* Parasite Immunol, 1997. **19**(8): p. 347-53.
- 453 14. Hassan, M.M., et al., *Different cytokines profiles in spleen cells and liver granuloma of*  
454 *Schistosoma mansoni experimentally infected mice during disease development.* J Egypt Soc  
455 Parasitol, 2000. **30**(1): p. 245-56.
- 456 15. Meyer, N.H., et al., *A Crystallin Fold in the Interleukin-4-inducing Principle of Schistosoma*  
457 *mansoni Eggs (IPSE/alpha-1) Mediates IgE Binding for Antigen-independent Basophil Activation.*  
458 J Biol Chem, 2015. **290**(36): p. 22111-26.
- 459 16. Metwali, A., et al., *Th2-type granuloma development in acute murine schistosomiasis is only*  
460 *partly dependent on CD4+ T cells as the source of IL-4.* Eur J Immunol, 2002. **32**(5): p. 1242-52.
- 461 17. Marshall, M.A., et al., *Mice infected with Schistosoma mansoni develop a novel non-T-*  
462 *lymphocyte suppressor population which inhibits virus-specific CTL induction via a soluble factor.*  
463 Microbes Infect, 2001. **3**(13): p. 1051-61.
- 464 18. McKee, A.S., et al., *Gr1+IL-4-producing innate cells are induced in response to Th2 stimuli and*  
465 *suppress Th1-dependent antibody responses.* Int Immunol, 2008. **20**(5): p. 659-69.



- 466 19. Schramm, G., et al., *Molecular characterization of an interleukin-4-inducing factor from*  
467 *Schistosoma mansoni* eggs. J Biol Chem, 2003. **278**(20): p. 18384-92.
- 468 20. Pennington, L.F., et al., *H-IPSE is a pathogen-secreted host nucleus infiltrating protein (infiltrin)*  
469 *expressed exclusively by the Schistosoma haematobium egg stage*. Infect Immun, 2017. **85**(12):  
470 p. e00301-17.
- 471 21. Fu, C.L., et al., *A novel mouse model of Schistosoma haematobium egg-induced*  
472 *immunopathology*. PLoS Pathog, 2012. **8**(3): p. e1002605.
- 473 22. Ray, D., et al., *Transcriptional profiling of the bladder in urogenital schistosomiasis reveals*  
474 *pathways of inflammatory fibrosis and urothelial compromise*. PLoS Negl Trop Dis, 2012. **6**(11):  
475 p. e1912.
- 476 23. Conti, S.L., et al., *Alterations in DNA methylation may be the key to early detection and*  
477 *treatment of schistosomal bladder cancer*. PLoS Negl Trop Dis, 2015. **9**(6): p. e0003696.
- 478 24. Tungekar, M.F., K.C. Gatter, and M.A. Ritter, *Bladder carcinomas and normal urothelium*  
479 *universally express gp200-MR6, a molecule functionally associated with the interleukin 4*  
480 *receptor (CD 124)*. British journal of cancer, 1996. **73**: p. 429-432.
- 481 25. Conticello, C., et al., *IL-4 Protects Tumor Cells from Anti-CD95 and Chemotherapeutic Agents via*  
482 *Up-Regulation of Antiapoptotic Proteins*. The Journal of Immunology, 2004. **172**: p. 5467-5477.
- 483 26. McCormick, S.M. and N.M. Heller, *Commentary: IL-4 and IL-13 receptors and signaling*.  
484 Cytokine, 2015. **75**(1): p. 38-50.
- 485 27. Webb, L.M. and E.D. Tait Wojno, *The role of rare innate immune cells in Type 2 immune*  
486 *activation against parasitic helminths*. Parasitology, 2017. **144**(10): p. 1288-1301.
- 487 28. van der Werf, M.J., et al., *Quantification of clinical morbidity associated with schistosome*  
488 *infection in sub-Saharan Africa*. Acta Trop, 2003. **86**(2-3): p. 125-39.
- 489 29. Mbanefo, E.C. and M.H. Hsieh, *Defining the Pathways of Urogenital Schistosomiasis-Associated*  
490 *Urothelial Carcinogenesis through Transgenic and Bladder Wall Egg Injection Models*. Methods  
491 Mol Biol, 2018. **1655**: p. 67-76.
- 492 30. Koonrungsesomboon, N., A.C. Wadagni, and E.C. Mbanefo, *Molecular markers and*  
493 *Schistosoma-associated bladder carcinoma: A systematic review and meta-analysis*. Cancer  
494 Epidemiology, 2015. **39**: p. 487-496.
- 495 31. Honeycutt, J., O. Hammam, and M.H. Hsieh, *Schistosoma haematobium egg-induced bladder*  
496 *urothelial abnormalities dependent on p53 are modulated by host sex*. Exp Parasitol, 2015. **158**:  
497 p. 55-60.
- 498 32. Ishida, K. and M.H. Hsieh, *Understanding Urogenital Schistosomiasis-Related Bladder Cancer:*  
499 *An Update*. Front Med (Lausanne), 2018. **5**: p. 223.
- 500 33. IARC, *Monograph on the evaluation of carcinogenic risks to humans: schistosomes, liver flukes*  
501 *and Helicobacter pylori*. WHO: International Agency for Research on Cancer, 1994. **61**: p. 9–  
502 175.
- 503 34. Eissa, S., et al., *Cell cycle regulators in bladder cancer: relationship to schistosomiasis*. IUBMB  
504 Life, 2004. **56**(9): p. 557-64.
- 505 35. Adedokun, S.A., et al., *Interleukin-4 and STAT6 promoter polymorphisms but not interleukin-10*  
506 *or 13 are essential for schistosomiasis and associated disease burden among Nigerian children*.  
507 Infect Genet Evol, 2018. **65**: p. 28-34.
- 508 36. Lukacs, N.W., et al., *Transgene-induced production of IL-4 alters the development and collagen*  
509 *expression of T helper cell 1-type pulmonary granulomas*. J Immunol, 1997. **158**(9): p. 4478-84.

- 510 37. Jankovic, D., et al., *Schistosome-infected IL-4 receptor knockout (KO) mice, in contrast to IL-4 KO*  
511 *mice, fail to develop granulomatous pathology while maintaining the same lymphokine*  
512 *expression profile*. J Immunol, 1999. **163**(1): p. 337-42.
- 513 38. Herbert, D.R., et al., *Alternative macrophage activation is essential for survival during*  
514 *schistosomiasis and downmodulates T helper 1 responses and immunopathology*. Immunity,  
515 2004. **20**(5): p. 623-35.
- 516 39. Herbert, D.R., et al., *IL-4R alpha expression by bone marrow-derived cells is necessary and*  
517 *sufficient for host protection against acute schistosomiasis*. J Immunol, 2008. **180**(7): p. 4948-  
518 55.
- 519 40. Leeto, M., et al., *TH1-dominant granulomatous pathology does not inhibit fibrosis or cause*  
520 *lethality during murine schistosomiasis*. Am J Pathol, 2006. **169**(5): p. 1701-12.
- 521 41. Dewals, B., et al., *IL-4Ralpha responsiveness of non-CD4 T cells contributes to resistance in*  
522 *schistosoma mansoni infection in pan-T cell-specific IL-4Ralpha-deficient mice*. Am J Pathol,  
523 2009. **175**(2): p. 706-16.
- 524 42. Marillier, R.G., et al., *IL-4R $\alpha$ -responsive smooth muscle cells increase intestinal*  
525 *hypercontractility and contribute to resistance during acute Schistosomiasis*. American journal  
526 of physiology. Gastrointestinal and liver physiology, 2010. **298**: p. G943--51.
- 527 43. Hurdal, R., et al., *IL-4-producing B cells regulate T helper cell dichotomy in type 1- and type 2-*  
528 *controlled diseases*. Proc Natl Acad Sci U S A, 2017. **114**(40): p. E8430-E8439.
- 529 44. Abdel Aziz, N., et al., *The Foxp3+ regulatory T-cell population requires IL-4Ralpha signaling to*  
530 *control inflammation during helminth infections*. PLoS Biol, 2018. **16**(10): p. e2005850.
- 531 45. Ndlovu, H., et al., *IL-4Ralpha-expressing CD11c(+) cells contribute to driving optimal cellular*  
532 *responses during Schistosoma mansoni infection in mice*. J Leukoc Biol, 2019. **105**(2): p. 307-  
533 316.
- 534 46. Roca, H., et al., *IL-4 induces proliferation in prostate cancer PC3 cells under nutrient-depletion*  
535 *stress through the activation of the JNK-pathway and survivin up-regulation*. Journal of Cellular  
536 Biochemistry, 2012. **113**: p. 1569-1580.
- 537 47. Suzuki, A., et al., *Targeting of IL-4 and IL-13 receptors for cancer therapy*, in Cytokine. 2015. p.  
538 79-88.
- 539 48. Gocheva, V., et al., *IL-4 induces cathepsin protease activity in tumor-associated macrophages to*  
540 *promote cancer growth and invasion*. Genes and Development, 2010. **24**: p. 241-255.
- 541 49. Hosoyama, T., et al., *IL-4R drives dedifferentiation, mitogenesis, and metastasis in*  
542 *rhabdomyosarcoma*. Clinical Cancer Research, 2011. **17**: p. 2757-2766.
- 543 50. Joshi, B.H., et al., *Interleukin-4 receptor alpha overexpression in human bladder cancer*  
544 *correlates with the pathological grade and stage of the disease*. Cancer medicine, 2014. **3**: p.  
545 1615-1628.
- 546 51. Natoli, A., et al., *Targeting the IL-4/IL-13 signaling pathway sensitizes Hodgkin lymphoma cells*  
547 *to chemotherapeutic drugs*. International Journal of Cancer, 2013. **133**: p. 1945-1954.
- 548 52. Venmar, K.T., et al., *IL4 receptor ILR4alpha regulates metastatic colonization by mammary*  
549 *tumors through multiple signaling pathways*. Cancer Res, 2014. **74**(16): p. 4329-40.
- 550 53. Sundac, L., et al., *Protein-based profiling of the immune response to uropathogenic Escherichia*  
551 *coli in adult patients immediately following hospital admission for acute cystitis*. Pathog Dis,  
552 2016. **74**(6).

- 553 54. Ma, E., et al., *A multiplexed analysis approach identifies new association of inflammatory*  
554 *proteins in patients with overactive bladder*. *Am J Physiol Renal Physiol*, 2016. **311**(1): p. F28-34.  
555 55. Fu, C.L., et al., *Mouse bladder wall injection*. *J Vis Exp*, 2011(53): p. e2523.  
556 56. Hsieh, Y.J., C.L. Fu, and M.H. Hsieh, *Helminth-induced interleukin-4 abrogates invariant natural*  
557 *killer T cell activation-associated clearance of bacterial infection*. *Infect Immun*, 2014. **82**(5): p.  
558 2087-97.  
559

## 560 **Acknowledgements**

561 We gratefully acknowledge our funding sources (the Margaret A. Stirewalt Endowment, NIDDK  
562 R01DK113504 and NIAID R56AI119168) and Jared Honeycutt for technical assistance.

563

## 564 **Author contributions**

565 Designed research studies (MHH), conducted experiments (ECM, CLF, LL, CPH, KI), acquired data  
566 (ECM, CLF, LL, CPH, KI), analyzed data (ECM, CLF, CPH, LL, KI, MHH), provided reagents (MHH),  
567 and wrote the manuscript (ECM, KI, MHH).

568

569

570

571

572

573

574

575

576

577

578

579

580

581 **Supplemental data**

582

583 **Figure S1. The size of egg-induced bladder granulomas is dependent on IL-4 receptor signaling.**

584 Bladder wall injection of 3 IL-4R $\alpha$  knock-out mice with 3000 *S. haematobium* eggs

585 #1M-day9-IL4RaKO\_Sh eggs #2M-day9-IL4RaKO\_Sh eggs #3M-day9-IL4RaKO\_Sh eggs

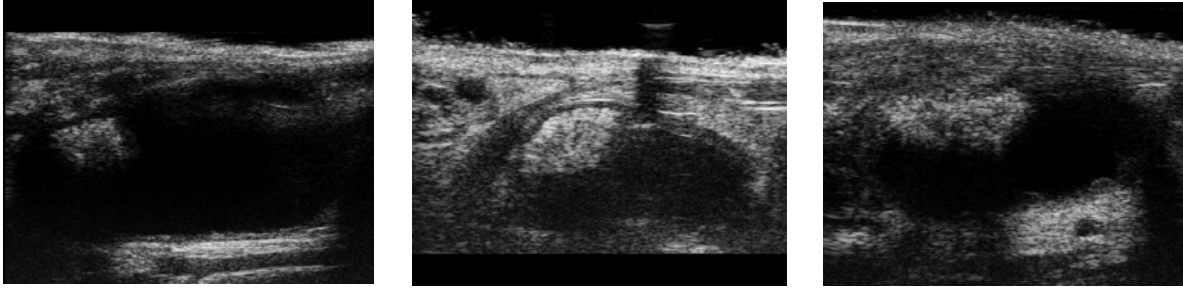

586

587

588

589 Bladder wall injection of 4 BALB/c mice with 3000 *S. haematobium* eggs

590 #1F-day9-BALB/c\_Sh eggs #2 F-day9-BALB/c\_Sh eggs #3F-day9-BALB/c\_Sh eggs

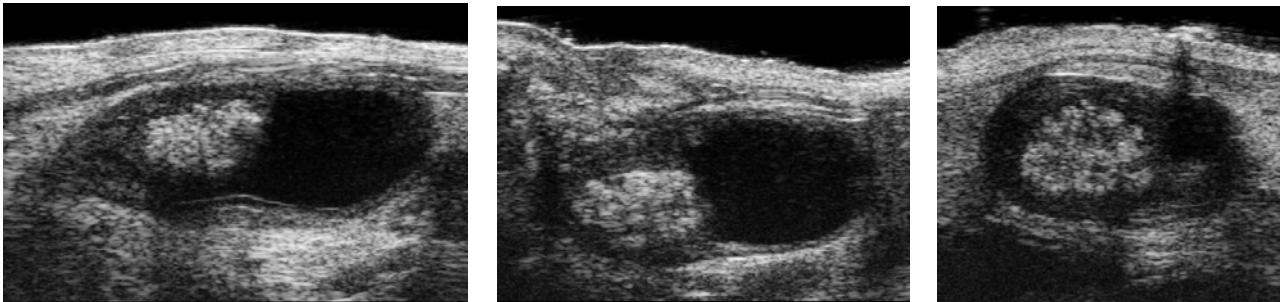

591

592

#4F-day9-BALB/c\_Sh eggs #5F-day9-BALB/c\_Sh eggs

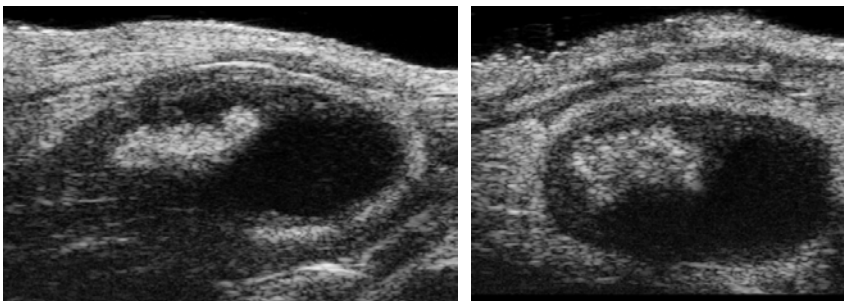

593

594

595

596

597

598

599 **Figure S2. Gating strategy to enrich for EpCAM<sup>+</sup>Uroplakin Ib<sup>+</sup>CD45<sup>-</sup> urothelial cells by flow**  
600 **cytometry.**

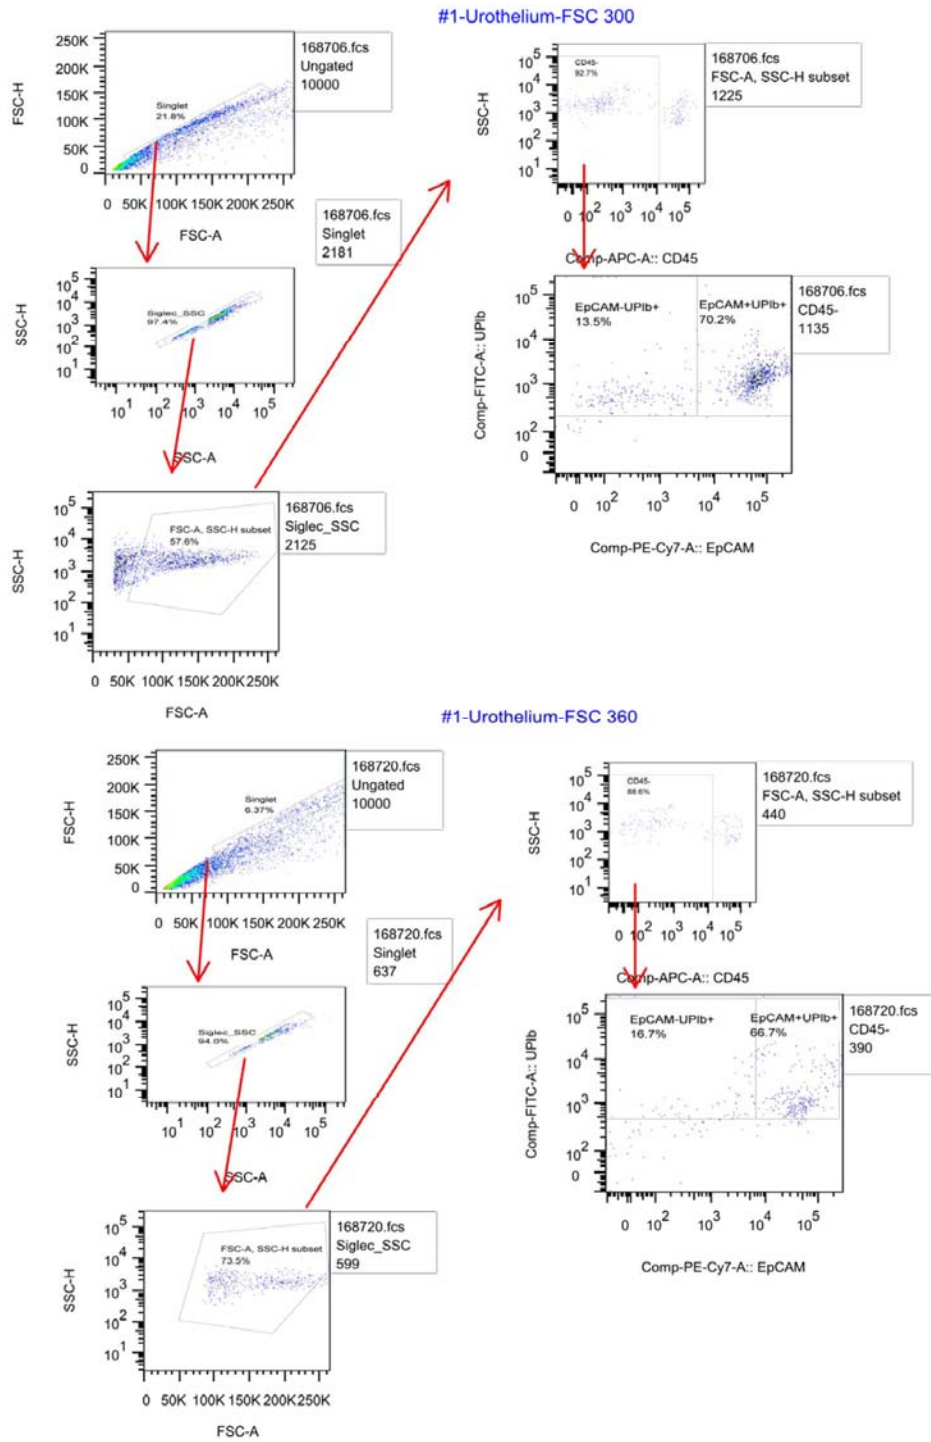

601

602

603 **Figure S3. IL-4 drives urothelial proliferation via the IL-4 receptor/PI3K/AKT-signaling pathway.**

604 HCV-29 cells were co-incubated for 48 hours with IL-4, followed by intracellular staining of  
605 phosphorylated downstream signaling proteins in the IL-4R signaling pathway. Specifically, antibodies  
606 against phosphorylated forms of STAT6, AKT and ERK1/2 were used to assess the activation status of  
607 the three signaling cascades in the IL-4R signaling pathway. In the presence of IL-4, there was  
608 significant increase in the activation status of AKT compared to cells incubated without IL-4. The  
609 STAT6 pathway, in addition to ERK1/2, was also partially activated. Horizontal bars in each dot plot  
610 show the mean while the error bars represent one standard deviation. \* =  $p < 0.05$ , \*\* =  $p < 0.01$ , \*\*\* =  
611  $p < 0.001$ , \*\*\*\* =  $p < 0.0001$ .

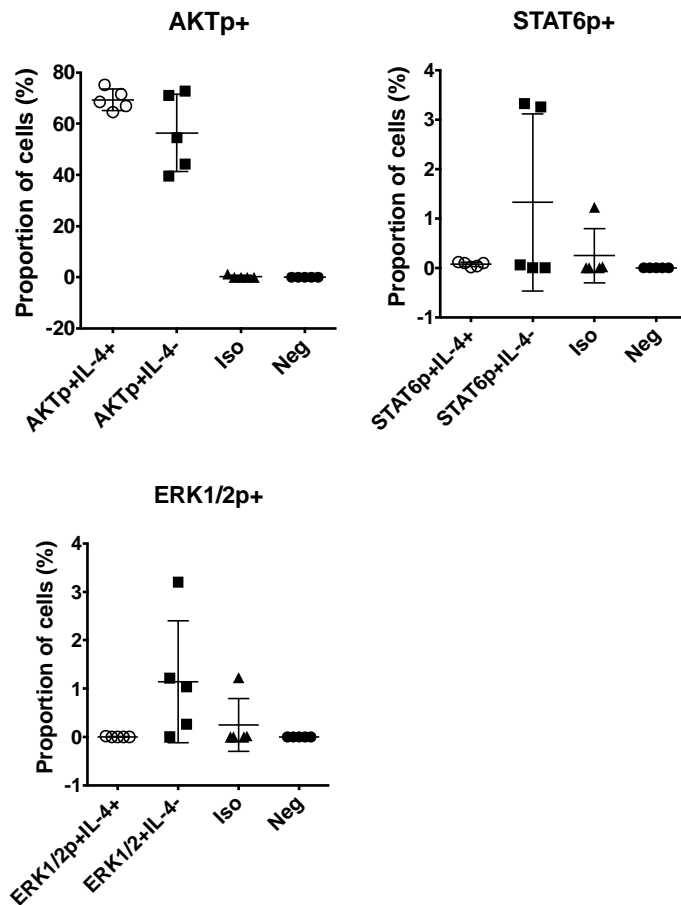

612

613

614



615 **Figure S4. Primary mouse bladder tissue features increased AKT phosphorylation in response to**  
616 **incubation with IL-4 *in vitro* in an IL-4 receptor-dependent fashion.** Bladders were excised from  
617 BALB/c or IL-4 receptor-deficient mice, incubated with recombinant IL-4 in culture, and subjected to  
618 Phospho flow cytometry using anti-pAKT antibodies.

619

620

621

622

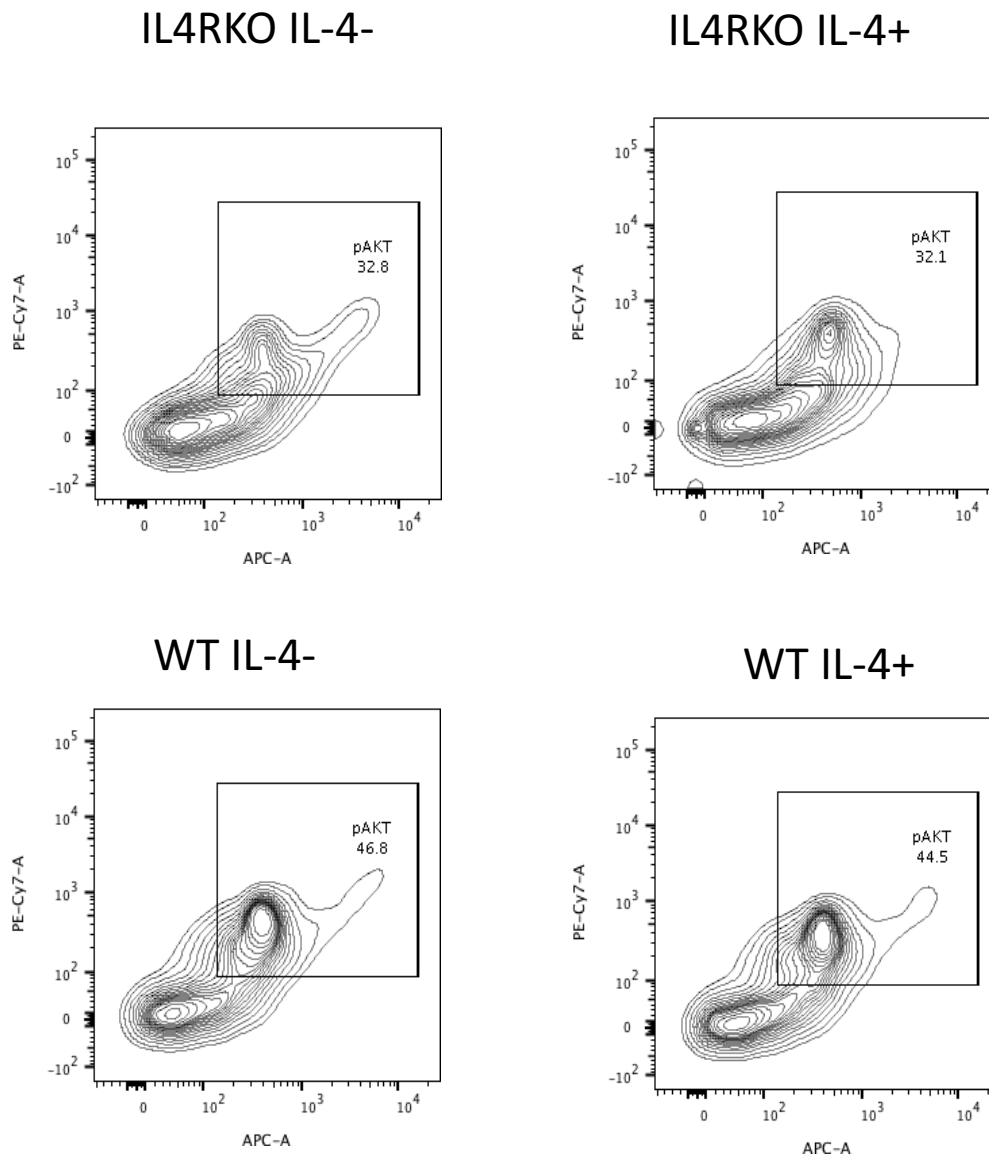

Source: https://www.biorxiv.org/content/10.1101/746552v1.full.pdf
